# Supplementary material for: Evaluation of Gas-to-Liquid Transfer with Ceramic Membrane Sparger for H2 and CO2 Fermentation
Source: MDPI journal article supplement (doi:10.3390/membranes12121220), 2022-12-02
Supplement: s1 [file s1]

Data sheet

Historical ranges market leaders

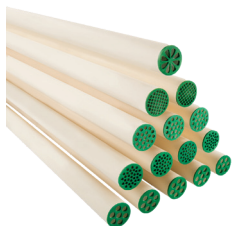

Kleansep™ membranes

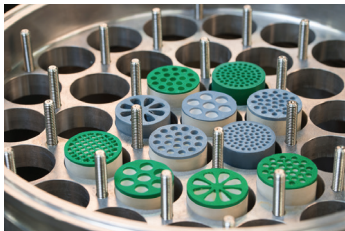

Kleansep™ modules

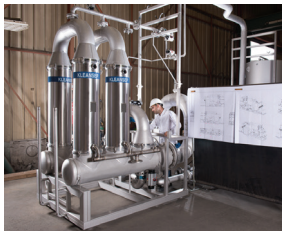

Kleansep™ filtration system

ALSYS ceramic membranes are tube-shaped filters with an asymmetrical membrane structure. With their unique design and construction, KLEANSEP™ products are well-suited to a wide range of applications.

ALSYS experiences in the field of ceramic membranes technology

| Recycle Water and Liquids                                                                 |                                                                                               | Process                                                                                                                    |                                                                                                   |
|-------------------------------------------------------------------------------------------|-----------------------------------------------------------------------------------------------|----------------------------------------------------------------------------------------------------------------------------|---------------------------------------------------------------------------------------------------|
|  Water |  Oil & Gas |  Chemistry                              |  Feed & Food |
| Treatment of industrial, domestic waste water through cross-flow filtration technologies  |                                                                                               | Production of chemicals, pharmaceuticals, animal feed or human food ingredients through cross-flow filtration technologies |                                                                                                   |
| Bioreactor treatment                                                                      | Recycling of produced water                                                                   | Bio-based formulations and materials                                                                                       | Industrial biotechnology by fermentation                                                          |
| Recycling of liquid resources                                                             | Treatment of oily water                                                                       | Chemical and pharmaceutical processes                                                                                      | Filtration of sugar, starch derivatives and beverages                                             |

What makes KLEANSEP™ unique ?

- Ability to withstand temperatures up to 150°C (300°F)
- High strength materials of construction
- Compatibility with harsh chemicals (oxidizers, extreme acid or caustic, solvents, etc.)
- Ability to withstand high concentrations of oil and solids
- **Reliable filtration performance**
- Tubular module: flexible membrane surface area from 0,16 m²/module to 69 m²/module
- High durability module: housings available in a variety of materials, gaskets available in different types of elastomers

Reliable filtration performance

- Temperature up to 150°C
- Max. TransMembrane Pressure : 10 bar
- pH range : 0 – 14
- Membrane materials: oxide-based ceramic
- Housing materials: steel (316L, 316Ti, Duplex, Super-duplex, Hastelloy ...), Fiber-glass (FRP) or Plastic (CPVC, ...)
- Gasket materials: NBR, EPDM, FPM, SILICONE

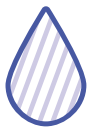

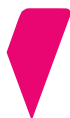

# Kleansep™ membranes technical features

|                                                                                   | Channels diameter (mm) | Membrane area (m²) | Ceramic tube length (mm) | External diameter (mm) | Number of channels | Code |
|-----------------------------------------------------------------------------------|------------------------|--------------------|--------------------------|------------------------|--------------------|------|
|  | 6                      | 0,16               | 1178 ± 0,5 mm            | 25 ± 0,5 mm            | 7                  | BX   |
|  | 5                      | 0,2                | 1178 ± 0,5 mm            | 25 ± 0,5 mm            | 8                  | BE   |
|  | 4,5                    | 0,2                | 1178 ± 0,5 mm            | 25 ± 0,5 mm            | 12                 | BD   |
|  | 3,5                    | 0,25               | 1178 ± 0,5 mm            | 25 ± 0,5 mm            | 19                 | BW   |
|  | 2,8                    | 0,34               | 1178 ± 0,5 mm            | 25 ± 0,5 mm            | 31                 | BH   |
|  | 2,2                    | 0,5                | 1178 ± 0,5 mm            | 25 ± 0,5 mm            | 55                 | BC   |
|  | 2                      | 0,45               | 1178 ± 0,5 mm            | 25 ± 0,5 mm            | 61                 | BS   |

## General features

Geometry: Multichannel tubular  
Ceramic support material: Oxide-based ceramic  
Ceramic membrane material: Oxide-based ceramic  
End sealing: 1 mm or 16 mm

## Thermal and chemical resistance

Maximum Temperature : Up to 150°C  
Sterilization : 121°C  
Sterilization by oxidizing agents : yes

## Membranes pore size and cut-off

Microfiltration: 1,0µm 0,45µm 0,2µm 0,1µm HR  
Ultrafiltration: 300 kD HF, 150 kD, 50 kD, 15 kD  
Nanofiltration\*: 5 kD, 1 kD

\*Contact us. Nanofiltration product are shaped with 19, 31 & 61 channel geometries

## Mechanical and chemical resistance

Maximum TransMembrane Pressure: 10 bar  
Bursting pressure: 80 bar  
pH range: 0 to 14  
Unaffected by solvents and radiation

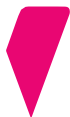

# Kleansep™ modules technical features

| MODULES GEOMETRY    |              | Membrane area per module depending on the membranes (m²) |      |      |       |       |      |       |
|---------------------|--------------|----------------------------------------------------------|------|------|-------|-------|------|-------|
| Number of membranes | Modules Code | BX                                                       | BE   | BD   | BW    | BH    | BC   | BS    |
|                     |              | 7                                                        | 8    | 12   | 19    | 31    | 55   | 61    |
| 1 membrane          | Module K01   | 0,16                                                     | 0,2  | 0,2  | 0,25  | 0,34  | 0,5  | 0,45  |
| 3 membranes         | Module K03   | 0,48                                                     | 0,6  | 0,6  | 0,75  | 1,02  | 1,5  | 1,35  |
| 7 membranes         | Module K07   | 1,12                                                     | 1,4  | 1,4  | 1,75  | 2,38  | 3,5  | 3,15  |
| 19 membranes        | Module K19   | 3,04                                                     | 3,8  | 3,8  | 4,75  | 6,46  | 9,5  | 8,55  |
| 37 membranes        | Module K37   | 5,92                                                     | 7,4  | 7,4  | 9,25  | 12,58 | 18,5 | 16,65 |
| 67 membranes        | Module K67   | 10,72                                                    | 13,4 | 13,4 | 16,75 | 24,48 | 33,5 | 30,15 |
| 99 membranes        | Module K99   | 15,84                                                    | 19,8 | 19,8 | 24,75 | 33,66 | 49,5 | 44,55 |
| 138 membranes       | Module K138  | 22,08                                                    | 27,6 | 27,6 | 34,5  | 46,92 | 69   | 62,1  |

## Housing general features

Steel type:

- Inox 316L
- Inox 316Ti
- Titanium
- Uranus B6 (904L)
- Hastelloy C22
- Hastelloy C276

Connection type:

- Clamp
- Flange (ISO,ANSI or DIN)

## Gaskets general features

Gaskets type:

- Single gasket / module
- Individual gasket / membrane

Gaskets elastomer materials:

- NBR
- EPDM
- FPM
- SILICONE

## Contacts ☎:

Europe: +33 (0)4 66 85 95 36  
North America: +1 857 504 2250  
Asia: +86 (0)21 6350 3377
